# Supplementary material
Source: PubMed Central journal article supplement (PMC3956172)
Supplement: 1312436111_pnas.201312436SI.pdf [file 1312436111_pnas.201312436SI.pdf]

# Supporting Information

Chapagain et al. 10.1073/pnas.1312436111

## SI Methods

**Hepatic Glucocorticoid Assay.** Whole rodent livers were snap-frozen and stored at  $-80^{\circ}\text{C}$ , then weighed and homogenized in RIPA buffer using a rotary-blade homogenizer. The homogenate was deproteinated immediately with 6% perchloric acid (1:1), then centrifuged at  $10,000 \times g$  for 15 min. The supernatant was then collected separately and neutralized 1:1 with 1 M potassium hydroxide. The supernatant after centrifugation ( $10,000 \times g$ , 10 min) was then passed through a Chromabond C18 column (Macherey-Nagel) using (i) two times 3 mL methanol, (ii) 3 mL  $\text{H}_2\text{O}$ , (iii) 3 mL 50 mM HCl, (iv) 6 mL homogenate, (v) 3 mL 50 mM HCl, and (vi) 13 mL  $\text{H}_2\text{O}$ . The steroids were collected using 6 mL 80% methanol (vol/vol), evaporated to dryness using a vacuum drier and reconstituted using 200  $\mu\text{L}$  80% methanol. Reconstituted hepatic steroids were quantified by HPLC using an apparatus consisting of a PU-2089 Quaternary Low Pressure Gradient Pump and MD-2010 Photometric Diode Array UV/Vis Detector (195–650 nm) from Jasco Instruments Ltd. The pump was connected to an AS-2055 Autosampler. Peak area was calculated by EZChrome Elite software (Agilent Technologies UK Ltd). For both systems, a reversed-phase ACE C18 column (0.46 cm  $\times$  15 cm; 5  $\mu\text{m}$ -particle size) from Hichrom Ltd. was used. The column was equilibrated with a solvent mixture consisting of 70:30 water:acetonitrile ( $\text{CH}_3\text{CN}$ ). After injection, the solvent mix was adjusted so that at 7 min, the mixture was 60:40 water: $\text{CH}_3\text{CN}$ .

Between 7 and 9 min the gradient was increased further so that 0:100 water: $\text{CH}_3\text{CN}$  was reached. Between 9 and 10 min the solvent mix was maintained at 0:100 water: $\text{CH}_3\text{CN}$ . Between 10 and 11 min the original solvent mix of 70:30 water: $\text{CH}_3\text{CN}$  was reapplied. UV chromatograms for 220 and 240 nm were analyzed and a 240:220 ratio was obtained and compared against steroid standard data. The AUC was analyzed on Prism 5.0 software to quantify unknown steroids against calibration curves.

**11 $\beta$ -Hydroxysteroid Dehydrogenase Type 1 Reductase Activity.** Oxoreductase 11 $\beta$ -HSD1 “reductase” activity was measured using methods as previously described by Hu et al. (1). Snap-frozen rodent livers from the experimental groups were lysed with RIPA buffer, then treated with 1% Triton X-100 in assay buffer containing 100 mM NaCl, 1 mM EGTA, 1 mM EDTA, 1 mM  $\text{MgCl}_2$ , 250 mM sucrose, and 20 mM Tris·HCl. Enzyme assays were performed using 50 mg sample protein incubated for 1 h at  $37^{\circ}\text{C}$  in 600  $\mu\text{L}$  of assay buffer containing NADPH (500  $\mu\text{M}$ ) and 11-dehydrocorticosterone (2,000 nM). Immediately following incubation, the samples were placed in a boiling water bath for 5 min. 11 $\beta$ -Hydroxysteroid dehydrogenase type 1 (11 $\beta$ HSD1) oxoreductase activity was then assessed by measuring corticosterone production using a corticosterone EIA kit (Cayman Chemical), and enzyme activity was expressed in units of pg of corticosterone produced per milligram of protein per minute.

1. Hu A, et al. (2009) Th2 cytokine-induced upregulation of 11beta-hydroxysteroid dehydrogenase-1 facilitates glucocorticoid suppression of proasthmatic airway smooth muscle function. *Am J Physiol Lung Cell Mol Physiol* 296(5):L790–L803.





**Table S1. Serum markers of renal failure in SNx rats**

| Laboratory parameters    | Sham        | SNx           | Sham + CBX  | SNx + CBX   |
|--------------------------|-------------|---------------|-------------|-------------|
| Serum sodium, mmol/L     | 135.9 ± 5.3 | 136.1 ± 3.2   | 135.1 ± 2.6 | 138.4 ± 2.2 |
| Serum potassium, mmol/L  | 4.9 ± 0.9   | 4.8 ± 0.5     | 4.4 ± 0.7   | 4.6 ± 0.2   |
| Serum urea, mmol/L       | 5.5 ± 0.3   | 30.7 ± 3.7*   | 8.7 ± 0.4   | 28.5 ± 1.4* |
| Serum creatinine, μmol/L | 38.1 ± 1.0  | 139.3 ± 10.9* | 41.9 ± 2.0  | 133 ± 6.5*  |
| Proteinuria, g/24 h      | 0.27 ± 0.04 | 3.6 ± 0.3*    | 0.21 ± 0.4  | 3.3 ± 0.5*  |

Renal dysfunction was determined in subtotal SNx rats ( $n = 8$  per group) by measurements of serum levels of creatinine, urea, sodium, and potassium and urine levels of protein. Data are expressed as mean ± SEM. \* $P < 0.05$  vs. sham.

**Table S2. Serum markers of renal failure in adenine-fed rats**

| Laboratory parameters    | CON         | Ad          | CON + CBX   | Ad + CBX      |
|--------------------------|-------------|-------------|-------------|---------------|
| Serum sodium, mmol/L     | 136.5 ± 4.5 | 135.7 ± 0.2 | 139.5 ± 1.4 | 141 ± 1.2     |
| Serum potassium, mmol/L  | 4.46 ± 0.2  | 5.24 ± 0.1* | 4.75 ± 0.2  | 5.7 ± 0.1*    |
| Serum urea, mmol/L       | 7.3 ± 0.4   | 86.4 ± 8.5* | 6.31 ± 0.7  | 92.1 ± 4.0*   |
| Serum creatinine, μmol/L | 39.6 ± 2.1  | 325 ± 20.4* | 37.48 ± 0.7 | 314.2 ± 18.3* |
| Proteinuria, g/24 h      | 0.1 ± 0.03  | 3.2 ± 0.3*  | 0.024 ± 0.1 | 3.7 ± 0.7*    |

Renal dysfunction was determined in adenine-fed rats ( $n = 8$  per group) by measurements of serum levels of creatinine, urea, sodium, and potassium and urine levels of protein. Ad, adenine; CON, control. Data are expressed as mean ± SEM. \* $P < 0.05$  vs. sham (Table S1).

**Table S3. Serum markers of renal failure in adenine-fed 11βHSD<sup>-/-</sup> mice**

| Laboratory parameters    | WT-CON      | WT-Ad       | 11βHSD1 <sup>-/-</sup> -CON | 11βHSD1 <sup>-/-</sup> -Ad |
|--------------------------|-------------|-------------|-----------------------------|----------------------------|
| Serum sodium, mmol/L     | 148.1 ± 3.2 | 147.2 ± 3.6 | 145.1 ± 4.1                 | 142.8 ± 2.6                |
| Serum potassium, mmol/L  | 5.6 ± 0.7   | 5.4 ± 1.2   | 5.6 ± 0.9                   | 5.3 ± 0.09                 |
| Serum urea, mmol/L       | 11.4 ± 2.5  | 43.7 ± 1.5* | 10.6 ± 3.3                  | 44.9 ± 2.6*                |
| Serum creatinine, μmol/L | 22.2 ± 2.2  | 68.6 ± 4.3* | 23.0 ± 3.1                  | 67.7 ± 3.7*                |

Renal dysfunction was determined in adenine-fed mice ( $n = 8$  per group) by measurements of serum levels of creatinine, urea, sodium, and potassium. WT, wild type. Data are expressed as mean ± SEM. \* $P < 0.05$  vs. control diet.

**Table S4. Baseline characteristics of SNx group**

| Measurements        | Sham         | SNx          | Sham + CBX   | SNx + CBX    |
|---------------------|--------------|--------------|--------------|--------------|
| Body weight, g      | 307.1 ± 92.6 | 303.7 ± 48.3 | 313.1 ± 19.6 | 302.1 ± 8.4  |
| Food intake, g/24 h | 27.1 ± 1.6   | 24.7 ± 2.2   | 26.8 ± 1.4   | 24.6 ± 2.6   |
| Mean HR, bpm        | 403.8 ± 23.2 | 416.3 ± 36.1 | 415.0 ± 26.3 | 423.8 ± 38.2 |
| MBP, mmHg           | 112.0 ± 38.1 | 135.5 ± 12.0 | 119.7 ± 26.4 | 152.0 ± 13.9 |

Measurements in experimental models of uremia ( $n = 8$  per group). Data are expressed as mean ± SEM. bpm, beats per minute; HR, heart rate; MBP, mean blood pressure.

**Table S5. Baseline characteristics of Ad group**

| Measurements        | CON          | Ad           | CON + CBX    | Ad + CBX     |
|---------------------|--------------|--------------|--------------|--------------|
| Body weight, g      | 325.4 ± 41.0 | 308.6 ± 41.0 | 312.6 ± 10.7 | 299.7 ± 8.3  |
| Food intake, g/24 h | 25.0 ± 2.1   | 21.5 ± 3.1   | 23.5 ± 2.5   | 20.5 ± 4.5   |
| Mean HR, bpm        | 436.5 ± 14.3 | 445.3 ± 36.1 | 434.4 ± 16.9 | 440.6 ± 21.4 |
| MBP, mmHg           | 122.0 ± 27.9 | 147.9 ± 25.5 | 129.5 ± 28.9 | 151.2 ± 15.9 |

**Table S6. Serum markers of renal failure in adenine-fed rats treated with specific 11 $\beta$ HSD1 inhibitor UE2316**

| Laboratory parameters         | CON + vehicle   | Ad + vehicle        | Ad + UE2316         |
|-------------------------------|-----------------|---------------------|---------------------|
| Serum sodium, mmol/L          | 145.2 $\pm$ 3.0 | 144.8 $\pm$ 3.4     | 142.2 $\pm$ 5.5     |
| Serum potassium, mmol/L       | 5.3 $\pm$ 0.3   | 4.9 $\pm$ 0.7       | 4.9 $\pm$ 0.6       |
| Serum urea, mmol/L            | 8 $\pm$ 2.4     | 73.6 $\pm$ 12.8***  | 72.6 $\pm$ 14.1***  |
| Serum creatinine, $\mu$ mol/L | 47.3 $\pm$ 11.6 | 301.7 $\pm$ 15.9*** | 291.1 $\pm$ 15.8*** |
| Serum albumin, g/L            | 25.8 $\pm$ 2.8  | 24.6 $\pm$ 2.6      | 25.1 $\pm$ 2.1      |

Renal dysfunction was determined in adenine-fed mice ( $n = 8$  per group) by measurements of serum levels of creatinine, urea, sodium, potassium, and albumin. Data are expressed as mean  $\pm$  SEM. \*\*\* $P < 0.05$  vs. control diet.

**Table S7. Quantitative PCR primer and probe sequences**

| Gene                                              | Gene accession no. | Dir   | Primer sequence                                  | nM  | Nanograms of cDNA per well |
|---------------------------------------------------|--------------------|-------|--------------------------------------------------|-----|----------------------------|
| <i>Cytosolic PECK</i>                             | XM_342593          | Fwd   | GTCATCCGCAAGCTGAAGAA                             | 300 | 10                         |
|                                                   |                    | Rev   | GCTTTCGATCCTGGCCACA                              | 300 |                            |
|                                                   |                    | Probe | 6-FAM-CAACTGTTGGCTGGCTCTCACTG<br>ACC-TAMRA       | 100 |                            |
| <i>PPAR<math>\gamma</math> coactivator 1alpha</i> | NM_031347          | Fwd   | TCTGGAAGTGCAGGCCTAACTC                           | 300 | 10                         |
|                                                   |                    | Rev   | AGCTTTGGCGAAGCCTTGA                              | 300 |                            |
|                                                   |                    | Probe | 6-FAM-ACGACTCCTCCTCATAAAGCCAACC<br>AAGATAA-TAMRA | 100 |                            |
| <i>3-hydroxy-3-methylglutaryl CoA reductase</i>   | NM_03134           | Fwd   | TCAGCTGTACCATGCCGTCTAT                           | 300 | 10                         |
|                                                   |                    | Rev   | CAGGCTTGCTGAGGTAGAAGGT                           | 300 |                            |
|                                                   |                    | Probe | 6-FAM-ATCGGAACCGTGGGTGGTGGG-TAMRA                | 100 |                            |
| <i>Fatty acid synthase</i>                        | NM_017332          | Fwd   | AATACAAAATGGAGCCACTGCAT                          | 300 | 10                         |
|                                                   |                    | Rev   | AACTTGAGGCCGGATGTT                               | 300 |                            |
|                                                   |                    | Probe | 6-FAM-CGGTGCATCCGCCCTCACT-TAMRA                  | 100 |                            |
| <i>Acetyl CoA carboxylase</i>                     | NM_022193          | Fwd   | CCGGTGCCCTCAACAAAGT                              | 300 | 10                         |
|                                                   |                    | Rev   | AACTCCGTTGTGCATTATCTG                            | 300 |                            |
|                                                   |                    | Probe | 6-FAM-TCGGGAAGTATACACCTCCAACAA<br>TCAGCTT-TAMRA  | 100 |                            |
| <i>11<math>\beta</math>HSD1</i>                   | NM_017080.2        | Fwd   | GCTTTTGACAGAGCGATTTGTT                           | 300 | 10                         |
|                                                   |                    | Rev   | CAGTCCACCAAGAGCTTTCC                             | 300 |                            |
|                                                   |                    | Probe | Sybr green                                       | 50  |                            |

Accession numbers refer to data deposited in NCBI Reference Sequence database. Dir, direction.
